# Supplementary material for: Supplemented Low-Protein Diet May Delay the Need for Preemptive Kidney Transplantation: A Nationwide Population-Based Cohort Study
Source: MDPI journal article supplement (doi:10.3390/nu13093002), 2021-08-28
Supplement: s1 [file s1]

**Supplemental Table S1.** ICD diagnostic codes

| Variable                    | ICD-9 CM code                                       | ICD-10 CM code                                                                                                                                                                      |
|-----------------------------|-----------------------------------------------------|-------------------------------------------------------------------------------------------------------------------------------------------------------------------------------------|
| Dialysis                    | 585.xx with dialysis treatment                      | N18 with dialysis treatment                                                                                                                                                         |
| Interstitial nephritis      | 583.89                                              | N11.8, N11.9, N14, N15.8 , N15.9                                                                                                                                                    |
| Obstructive nephropathy     | 599.6                                               | N13 with N18.3 to N18.6 at the same time                                                                                                                                            |
| Polycystic kidney           | 753.12, 753.13, 753.14                              | Q61.1, Q61.2, Q61.3                                                                                                                                                                 |
| Hypertensive kidney disease | 403.90                                              | I12                                                                                                                                                                                 |
| Diabetic nephropathy        | 583.81                                              | E08.2, E09.2, E10.2, E11.2, E13.2                                                                                                                                                   |
| Chronic glomerulonephritis  | 581.xx, 582.xx                                      | N03, N04                                                                                                                                                                            |
| Hypertension                | 401.xx-405.xx with any anti-hypertension drugs      | I10-I15, N262 with any anti-hypertension drugs                                                                                                                                      |
| Diabetes mellitus           | 250.xx with any oral hypoglycemic drugs and insulin | E08-E13 with any oral hypoglycemic drugs and insulin                                                                                                                                |
| Dyslipidemia                | 272.0-272.4 with any anti-hyperlipidemia drugs      | E77, E780, E781, E782, E783, E784, E785, E786, E881, E753, E755, E882, E756, E789, E7521, E7522, E7524, E7130, E7879, E7881, E7889, E8889, E7870 with any anti-hyperlipidemia drugs |
| Gouty arthritis             | 274.xx                                              | M10, M1A.0, M1A.2, M1A.3, M1A.4, M1A.9, N20.0                                                                                                                                       |
| Peptic ulcer / GERD         | 531.xx-534.xx                                       | K25–K28                                                                                                                                                                             |
| Ischemic heart disease      | 410.xx-414.xx                                       | I20-I24                                                                                                                                                                             |
| Liver cirrhosis             | 571.2, 571.5, 571.6                                 | K702-K703, K741-K746                                                                                                                                                                |
| Heart failure               | 428.xx                                              | I50                                                                                                                                                                                 |
| Ischemic stroke             | 433.xx-437.xx                                       | I66, I65.1, I65.0, I65.8, I65.9, I63.6, I63.8,                                                                                                                                      |

| Variable                    |  | ICD-9 CM code                                                                                                                                                                                                                                                                                                                                                                                                                                                                                                                                                                                                                                                                   | ICD-10 CM code                                                                                                                                                                                                                                                                                                                                                                                                                                                                                                                                                                                                              |
|-----------------------------|--|---------------------------------------------------------------------------------------------------------------------------------------------------------------------------------------------------------------------------------------------------------------------------------------------------------------------------------------------------------------------------------------------------------------------------------------------------------------------------------------------------------------------------------------------------------------------------------------------------------------------------------------------------------------------------------|-----------------------------------------------------------------------------------------------------------------------------------------------------------------------------------------------------------------------------------------------------------------------------------------------------------------------------------------------------------------------------------------------------------------------------------------------------------------------------------------------------------------------------------------------------------------------------------------------------------------------------|
|                             |  |                                                                                                                                                                                                                                                                                                                                                                                                                                                                                                                                                                                                                                                                                 | I63.9, G45.0, G45.8, G45.1, G45.2, G46.0, G46.1, G46.2, G45.9, G45.4, G46.3, G46.4, G46.5, G46.6, G46.7, G46.8, I67.0, I67.1, I67.2, I67.4, I67.5, I67.6, I67.7, I67.9, I68.0, I68.2, I68.8                                                                                                                                                                                                                                                                                                                                                                                                                                 |
| Hemorrhage stroke           |  | 430.xx-432.xx                                                                                                                                                                                                                                                                                                                                                                                                                                                                                                                                                                                                                                                                   | I60-I62                                                                                                                                                                                                                                                                                                                                                                                                                                                                                                                                                                                                                     |
| Myocardial infarction       |  | 410.xx, 412.xx                                                                                                                                                                                                                                                                                                                                                                                                                                                                                                                                                                                                                                                                  | I21-I22                                                                                                                                                                                                                                                                                                                                                                                                                                                                                                                                                                                                                     |
| Acute myocardial infarction |  | 410.xx                                                                                                                                                                                                                                                                                                                                                                                                                                                                                                                                                                                                                                                                          | I21-I22                                                                                                                                                                                                                                                                                                                                                                                                                                                                                                                                                                                                                     |
| Cardiovascular death        |  | 390.xx – 459.xx, 785.5x                                                                                                                                                                                                                                                                                                                                                                                                                                                                                                                                                                                                                                                         | I00-I99, R570, R579                                                                                                                                                                                                                                                                                                                                                                                                                                                                                                                                                                                                         |
| Infection death             |  | 559, 0031, 0362, 0380, 03810, 03811, 03812, 03819, 0382, 0383, 03840, 03841, 03842, 03843, 03844, 03849, 0388, 0389, 04082, 0545, 1125, 78552, 7907, 7908, 99591, 99592, 03282, 03640, 03641, 03642, 03643, 07420, 07421, 07422, 07423, 11281, 11503, 11504, 11593, 11594, 1303, 3910, 3911, 3912, 3918, 3919, 3920, 4210, 4211, 4219, 4220, 42292, 00321, 0360, 0361, 0470, 0471, 0478, 0479, 048, 0490, 0491, 0498, 0499, 0530, 05310, 05314, 0543, 05472, 05474, 0550, 05600, 05601, 05609, 05821, 05829, 0621, 0622, 0623, 0625, 0628, 0629, 0638, 0639, 064, 06641, 06642, 0721, 0722, 11283, 1142, 11501, 11591, 1300, 3200, 3201, 3202, 3203, 3207, 32081, 32082, 32089, | B05.9, A02.1, A39.2, H61.001, A41.01, H65.30, A41.1, A40.3, A41.4, A41.3, A41.51, A41.52, A41.53, A41.59, A41.89, A41.9, B00.7, A15.0, R78.81, B34.9, A36.81, A39.53, A39.51, A39.52, B33.23, B33.21, B33.22, B37.6, B39.4, B39.4, B39.9, B39.9, A17.0, I01.1, I01.2, I01.8, I01.9, I39, I33.9, I40.0, A02.21, H44.001, A39.81, J34.2, A87.0, A87.0, A87.9, A03.8, J40, A87.1, A85.0, A86, K22.0, K25.4, B00.4, B00.3, K40.40, B06.01, B06.02, N03.1, N03.9, A83.1, A83.2, A83.3, A83.5, A83.6, A83.9, A84.8, A84.9, A06.5, O70.1, O70.2, B26.1, B26.2, B37.5, A15.0, B39.4, B39.9, G00.1, G00.2, G00.3, G01, G00.8, G00.9, |

| Variable | ICD-9 CM code                                                                                                                                                                                                                                                                                                                                                                                                                                                                                                                                                                                                                                                                                                                                                                                                                                                                                                                                                                                                                                                                    | ICD-10 CM code                                                                                                                                                                                                                                                                                                                                                                                                                                                                                                                                                                                                                                                                                                                                                                                                                                                                                                                                                                                      |
|----------|----------------------------------------------------------------------------------------------------------------------------------------------------------------------------------------------------------------------------------------------------------------------------------------------------------------------------------------------------------------------------------------------------------------------------------------------------------------------------------------------------------------------------------------------------------------------------------------------------------------------------------------------------------------------------------------------------------------------------------------------------------------------------------------------------------------------------------------------------------------------------------------------------------------------------------------------------------------------------------------------------------------------------------------------------------------------------------|-----------------------------------------------------------------------------------------------------------------------------------------------------------------------------------------------------------------------------------------------------------------------------------------------------------------------------------------------------------------------------------------------------------------------------------------------------------------------------------------------------------------------------------------------------------------------------------------------------------------------------------------------------------------------------------------------------------------------------------------------------------------------------------------------------------------------------------------------------------------------------------------------------------------------------------------------------------------------------------------------------|
|          | 3209, 3210, 3211, 3212, 3230, 32301, 32302, 3231, 3234, 32341, 32342, 3240, 3241, 3249, 03283, 5670, 5671, 5672, 56721, 56722, 56723, 56729, 56789, 5679, 0030, 0038, 0039, 0040, 0041, 0043, 0048, 0049, 0050, 0051, 0052, 0053, 0054, 00581, 00589, 0059, 0071, 0074, 0075, 00800, 00801, 00802, 00803, 00804, 00809, 0081, 0082, 0083, 00841, 00842, 00843, 00844, 00845, 00846, 00847, 00849, 0085, 00861, 00862, 00863, 00864, 00865, 00866, 00867, 00869, 0088, 0090, 0091, 0092, 0093, 0392, 0700, 0701, 07043, 07053, 0723, 07271, 11285, 1305, 5400, 5401, 5409, 541, 542, 56201, 56203, 56211, 56213, 566, 56781, 5695, 5720, 5721, 5750, 57510, 03284, 0720, 59010, 59011, 5902, 5903, 59080, 59081, 5909, 5950, 5954, 59589, 5959, 5970, 59800, 59801, 5990, 6010, 6012, 6013, 6014, 6019, 6031, 6040, 60490, 60491, 6071, 6072, 6080, 6084, 6140, 6142, 6143, 6145, 6150, 6159, 6163, 6164, 00322, 01100, 01101, 01102, 01103, 01104, 01105, 01106, 01110, 01111, 01112, 01113, 01114, 01115, 01116, 01120, 01121, 01122, 01123, 01124, 01125, 01126, 01130, 01131, | G00.8, G00.9, G02, G02, G05.3, G05.3, G06.1, G06.2, A36.89, B06.82, K65.0, B06.81, A30.5, A02.8, A02.9, A48.0, A03.1, A03.3, A03.8, A03.9, B03, A05.1, A05.2, A05.8, A05.3, A05.5, A05.4, A05.9, A07.1, A07.2, A07.4, S02.0XXA, A04.0, A04.1, A04.2, A04.3, A04.4, A04.8, A04.8, A04.8, A04.8, A04.8, A04.5, A04.6, A04.7, A04.8, A04.8, A04.8, A04.9, A08.0, A08.2, A08.11, A08.19, A08.31, A08.32, A08.39, A08.39, A08.4, A50.01, A09, A09, A09, A42.1, L84, B15.9, B17.2, B17.2, B26.3, B26.81, B37.82, A17.0, K35.3, K35.80, A60.00, B00.2, K57.00, K57.01, K57.20, K57.21, K61.0, K63.0, K75.1, A36.85, M08.1, N10, N15.1, N28.84, N16, N15.9, N30.80, N30.80, N30.90, N37, N41.2, N41.3, N51, N41.9, N43.1, N51, N47.6, N48.21, N49.1, N70.91, N73.0, N73.3, N71.9, N75.1, N76.4, A02.22, A15.0, A15.5, A15.5, A15.5, A15.5, A15.5, A15.5, A15.0, A15.0, A15.0, A15.0, A15.0, A15.0, |

| Variable | ICD-9 CM code                                                                                                                                                                                                                                                                                                                                                                                                                                                                                                                                                                                                                                                                                                                                                                                                                                                                                                                                                                                                                                                                                                                                     | ICD-10 CM code                                                                                                                                                                                                                                                                                                                                                                                                                                                                                                                                                                                                                                                                                                                                                                                                                                                                                                                                                                                                                                                                |
|----------|---------------------------------------------------------------------------------------------------------------------------------------------------------------------------------------------------------------------------------------------------------------------------------------------------------------------------------------------------------------------------------------------------------------------------------------------------------------------------------------------------------------------------------------------------------------------------------------------------------------------------------------------------------------------------------------------------------------------------------------------------------------------------------------------------------------------------------------------------------------------------------------------------------------------------------------------------------------------------------------------------------------------------------------------------------------------------------------------------------------------------------------------------|-------------------------------------------------------------------------------------------------------------------------------------------------------------------------------------------------------------------------------------------------------------------------------------------------------------------------------------------------------------------------------------------------------------------------------------------------------------------------------------------------------------------------------------------------------------------------------------------------------------------------------------------------------------------------------------------------------------------------------------------------------------------------------------------------------------------------------------------------------------------------------------------------------------------------------------------------------------------------------------------------------------------------------------------------------------------------------|
|          | 01132, 01133, 01134, 01135, 01136, 01150,<br>01151, 01152, 01153, 01154, 01155, 01156,<br>01160, 01161, 01162, 01163, 01164, 01165,<br>01166, 01170, 01171, 01172, 01173, 01174,<br>01175, 01176, 01180, 01181, 01182, 01183,<br>01184, 01185, 01186, 01190, 01191, 01192,<br>01193, 01194, 01195, 01196, 0310, 0330, 0338,<br>0339, 0391, 0521, 0551, 0730, 0796, 1124,<br>1140, 1145, 11505, 11595, 1304, 1363, 4650,<br>4658, 4659, 4660, 46611, 46619, 4800, 4801,<br>4802, 4803, 4808, 4809, 481, 4820, 4821, 4822,<br>48230, 48231, 48232, 48239, 48240, 48241,<br>48242, 48249, 48281, 48282, 48283, 48284,<br>48289, 4829, 4830, 4831, 4838, 4841, 4843,<br>4846, 4847, 4848, 485, 486, 4870, 4871, 488,<br>4880, 4881, 490, 49122, 4941, 5100, 5109,<br>5111, 5130, 5131, 5192, 0311, 03285, 0390,<br>0400, 37601, 6800, 6801, 6802, 6803, 6804,<br>6805, 6806, 6807, 6808, 6809, 68100, 68101,<br>68110, 68111, 6819, 6820, 6821, 6822, 6823,<br>6824, 6825, 6826, 6827, 6828, 6829, 684, 6850,<br>6868, 6869, 72886, 9101, 9103, 9109, 9111,<br>9113, 9119, 9121, 9123, 9129, 9131, 9133,<br>9139, 9141, 9143, 9149, 9151, 9153, 9159, | A15.0, A15.0, A15.0, A15.0, A15.0, A15.0,<br>A15.0, A15.0, A15.0, A15.0, A15.0, A15.0,<br>A15.0, A15.0, A15.0, A15.0, A15.0, A15.0,<br>A15.0, A15.0, A15.0, A15.0, A15.0, A15.0,<br>F07.0, E75.23, A37.80, A37.90, A42.0,<br>B01.2, B05.2, M86.00, B97.4, A15.0, A15.0,<br>B39.0, B39.9, A17.0, A17.82, J06.9, J06.9,<br>J21.0, J21.1, J12.1, J12.2, J12.3, J12.9, J13,<br>J15.1, J14, J15.4, J15.3, J15.4, J15.211,<br>J15.29, J15.8, J15.5, J15.6, A48.1, J15.8,<br>J15.9, J16.0, J16.8, B25.0, A37.91, B44.0,<br>J17, J17, J18.0, J18.8, J09.X2, J40, J47.0,<br>J86.9, J90, J85.3, J98.5, A31.1, A36.3, I00,<br>H05.011, L02.12, L02.221, L02.421,<br>L02.521, L02.32, L02.425, L02.621,<br>L02.821, L02.92, L03.011, L03.031,<br>L03.019, L02.11, L02.211, L02.411,<br>L02.511, L02.31, L02.415, L02.611,<br>L02.811, L02.91, L01.00, B78.1, L08.9,<br>M72.6, L08.89, L08.89, L08.89, L08.89,<br>L08.89, L08.89, L08.89, L08.89, L08.89,<br>L08.89, L08.89, L08.89, L08.89, L08.89,<br>L08.89, A51.43, L08.89, L08.89, A51.46,<br>L08.89, A51.49, L08.89, L08.89, L08.89, |

| Variable | ICD-9 CM code                                                                                                                                                                                                                                                                                                                                                                                                                                                                                                                                                                                                                                                                                                                                                                                                                                                                                                                                                                                                                    | ICD-10 CM code                                                                                                                                                                                                                                                                                                                                                                                                                                                                                                                                                                                                                                                                                                                                                                                                                                                                                                                                            |
|----------|----------------------------------------------------------------------------------------------------------------------------------------------------------------------------------------------------------------------------------------------------------------------------------------------------------------------------------------------------------------------------------------------------------------------------------------------------------------------------------------------------------------------------------------------------------------------------------------------------------------------------------------------------------------------------------------------------------------------------------------------------------------------------------------------------------------------------------------------------------------------------------------------------------------------------------------------------------------------------------------------------------------------------------|-----------------------------------------------------------------------------------------------------------------------------------------------------------------------------------------------------------------------------------------------------------------------------------------------------------------------------------------------------------------------------------------------------------------------------------------------------------------------------------------------------------------------------------------------------------------------------------------------------------------------------------------------------------------------------------------------------------------------------------------------------------------------------------------------------------------------------------------------------------------------------------------------------------------------------------------------------------|
|          | 9161, 9163, 9169, 9171, 9173, 9179, 9191,<br>9193, 9199, 00323, 00324, 03682, 37603,<br>05671, 71100, 71101, 71102, 71103, 71104,<br>71105, 71106, 71107, 71108, 71109, 71140,<br>71141, 71142, 71143, 71144, 71145, 71146,<br>71147, 71148, 71149, 71150, 71151, 71152,<br>71153, 71154, 71155, 71156, 71157, 71158,<br>71159, 71160, 71161, 71162, 71163, 71164,<br>71165, 71166, 71167, 71168, 71169, 71180,<br>71181, 71182, 71183, 71184, 71185, 71186,<br>71187, 71188, 71189, 71190, 71191, 71192,<br>71193, 71194, 71195, 71196, 71197, 71198,<br>71199, 73000, 73001, 73002, 73003, 73004,<br>73005, 73006, 73007, 73008, 73009, 73020,<br>73021, 73022, 73023, 73024, 73025, 73026,<br>73027, 73028, 73029, 73080, 73081, 73082,<br>73083, 73084, 73085, 73086, 73087, 73088,<br>73089, 73090, 73091, 73092, 73093, 73094,<br>73095, 73096, 73097, 73098, 73099, 99662,<br>99931, 99668, 53086, 53641, 56961, 99660,<br>99661, 99663, 99664, 99665, 99666, 99667,<br>99669, 99731, 99802, 99851, 99859, 9993,<br>99939 | L08.89, L08.89, L08.89, A02.23, A02.24,<br>A39.83, H05.021, B06.82, M00.011,<br>M00.021, M00.031, M00.041, M00.051,<br>M00.061, M00.071, M00.08, M00.09,<br>M01.X11, M01.X21, M01.X31, M01.X41,<br>M01.X51, M01.X61, M01.X71, M01.X8,<br>M01.X9, M01.X11, M01.X21, M01.X31,<br>M01.X41, M01.X51, M01.X61, M01.X71,<br>M01.X8, M01.X9, M01.X11, M01.X21,<br>M01.X31, M01.X41, M01.X51, M01.X61,<br>M01.X71, M01.X8, M01.X9, M01.X11,<br>M01.X21, M01.X31, M01.X41, M01.X51,<br>M01.X61, M01.X71, M01.X8, M01.X9,<br>M01.X19, M01.X29, M01.X39, M01.X49,<br>M01.X59, M01.X69, M01.X79, M01.X8,<br>M01.X9, M86.011, M86.021, M86.031,<br>M86.041, M86.051, M86.061, M86.071,<br>M86.08, M86.09, M86.9, M86.9, M86.9,<br>M86.9, M86.9, M86.9, M86.9, M46.20,<br>M86.9, M90.811, M90.821, M90.831,<br>M90.841, M90.851, M90.861, M90.871,<br>M90.88, M90.89, M86.9, M86.9, M86.9,<br>M86.9, M86.9, M86.9, M86.9, M46.30,<br>M86.9, T80.211A, T85.71XA, K94.22, |

| Variable                      | ICD-9 CM code                                  | ICD-10 CM code                                                                                        |
|-------------------------------|------------------------------------------------|-------------------------------------------------------------------------------------------------------|
|                               |                                                | K94.02, T82.6XXA, T85.79XA, T83.51XA, T83.59XA, T84.50XA, T84.60XA, T85.72XA, T81.4XXA, K68.11, N98.0 |
| Sepsis                        | 038.xx, 790.7                                  | A40, A41                                                                                              |
| Malignancy                    | 140.xx-208.xx                                  | C00-C96                                                                                               |
| Osteoporosis-related fracture | 733.1x, 805.xx-829.xx, excluding E810.x-E819.x | S02, S12, S22, S32, S42, S52, S62, S72, S82, S93, M80 and without accident mark                       |

ICD, International Classification of Diseases; CM, Clinical Modification.
